# Supplementary material
Source: Springer Nature journal article supplement (https://www.springermedizin.de/resource/supplementary/12889_2010_3230_MOESM6_ESM.pdf/9488436)

% Subjects

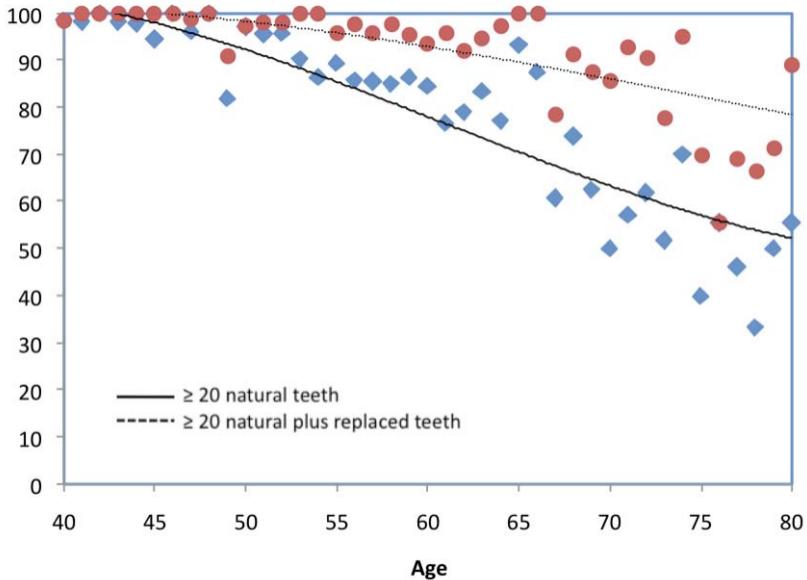

Supplement: MOESM6 [file 9488436]
